# Supplementary material
Source: PubMed Central journal article supplement (PMC2673899)
Supplement: 12192_2008_56_MOESM1_ESM.pdf [file 12192_2008_56_MOESM1_ESM.pdf]

Supplementary Figure 1. Rosales-Hernandez *et al* 2007

Table A. Length of the three domains

| Gene              | Domain Length (a.a.)    |                                    |                                 |
|-------------------|-------------------------|------------------------------------|---------------------------------|
|                   | J domain<br>(IPR001623) | DnaJ central region<br>(IPR001305) | DnaJ, C-terminal<br>(IPR002939) |
| DnaJ_Ecoli        | 63                      | 81                                 | 102                             |
| Ydj1_Yeast        | 62                      | 86                                 | 123                             |
| Rdj2_Rat          | 56                      | 87                                 | 127                             |
| CSP $\alpha$ _Rat | 63                      | -                                  | -                               |

Table B. Amino acid homology between J domains

| Identity   | DnaJ_Ecoli | Ydj1_Yeast | Rdj2_Rat | CSP_Rat |
|------------|------------|------------|----------|---------|
| DnaJ_Ecoli | 100%       | 54%        | 52%      | 49%     |
| Ydj1_Yeast |            | 100%       | 66%      | 59%     |
| Rdj2_Rat   |            |            | 100%     | 51%     |
| CSP_Rat    |            |            |          | 100%    |

Table C. Amino acid homology between DnaJ, Ydj1 and Rdj2

| Identity   | DnaJ_Ecoli | Ydj1_Yeast | Rdj2_Rat |
|------------|------------|------------|----------|
| DnaJ_Ecoli | 100%       | 32%        | 31%      |
| Ydj1_Yeast |            | 100%       | 49%      |
| Rdj2_Rat   |            |            | 100%     |
